# Supplementary material
Source: publisher site journal article supplement (https://www.dovepress.com/article/523621)
Supplement: Supplementary file 1 [file 523621%20Revised%20Figure%20S1-S14.docx]

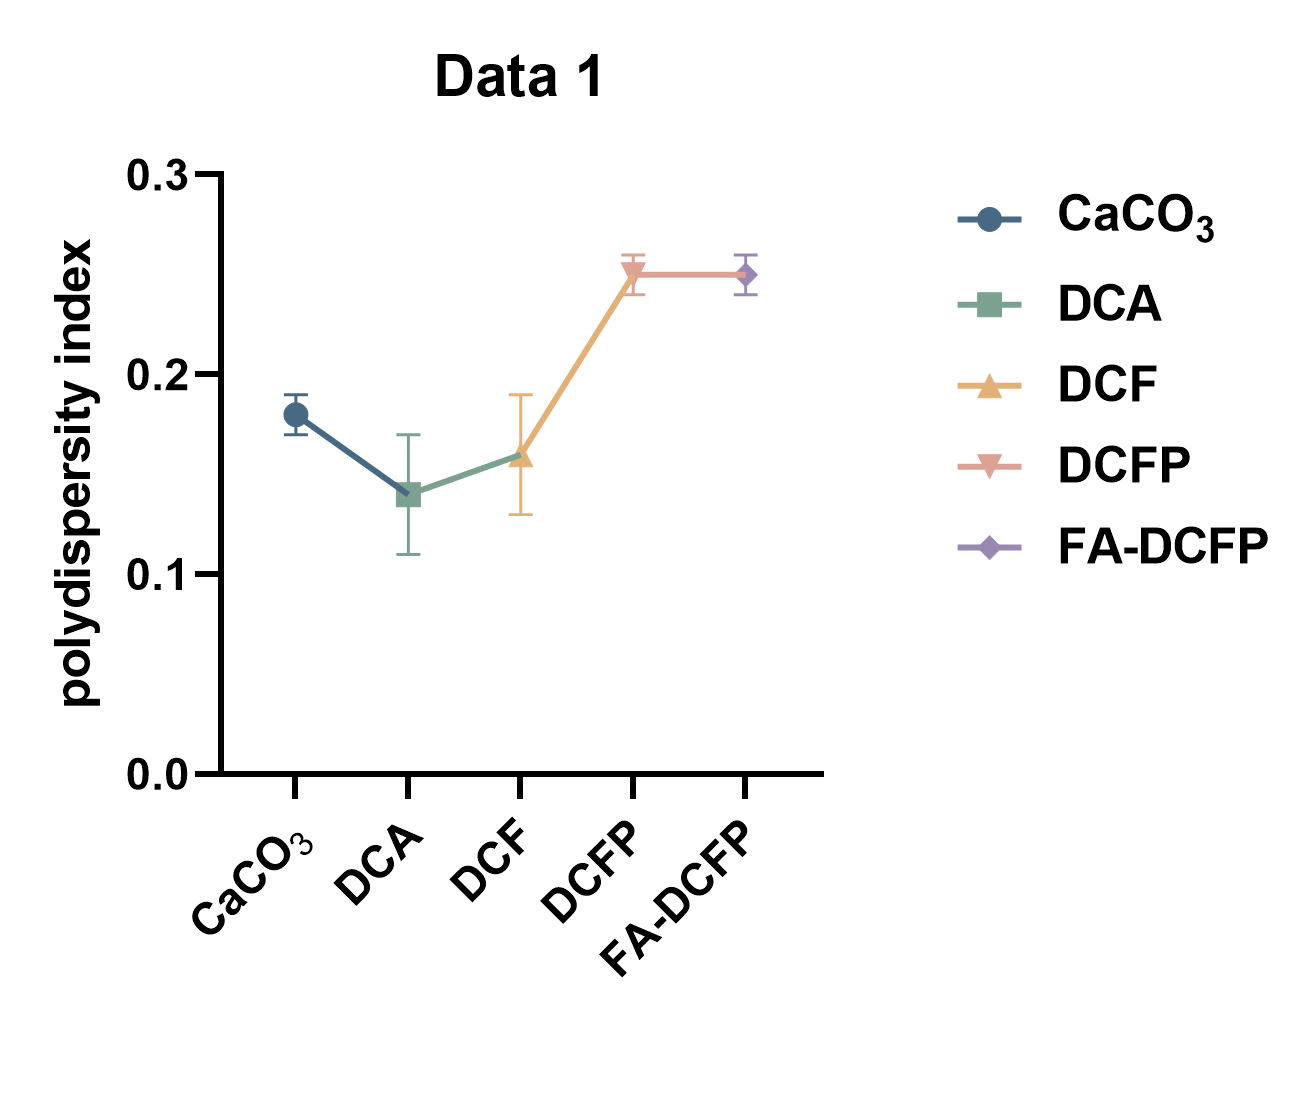


Figure S1. Polydispersity index (n = 3) of CaCO3, DCA (CaCO3+DOX), DCF (DOX+CaCO3+5-Fu), DCFP (CaCO3+DOX+5-Fu+PDA) and FA-DCFP (FA+CaCO3+DOX+5-Fu+PDA).


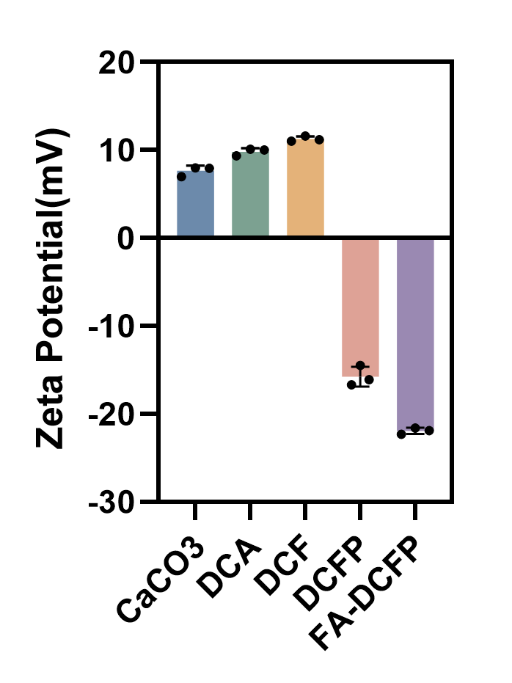


Figure S2. Zeta potential (n = 3) of CaCO3, DCA (CaCO3+DOX), DCF (DOX+CaCO3+5-Fu), DCFP (CaCO3+DOX+5-Fu+PDA) and FA-DCFP (FA+CaCO3+DOX+5-Fu+PDA).


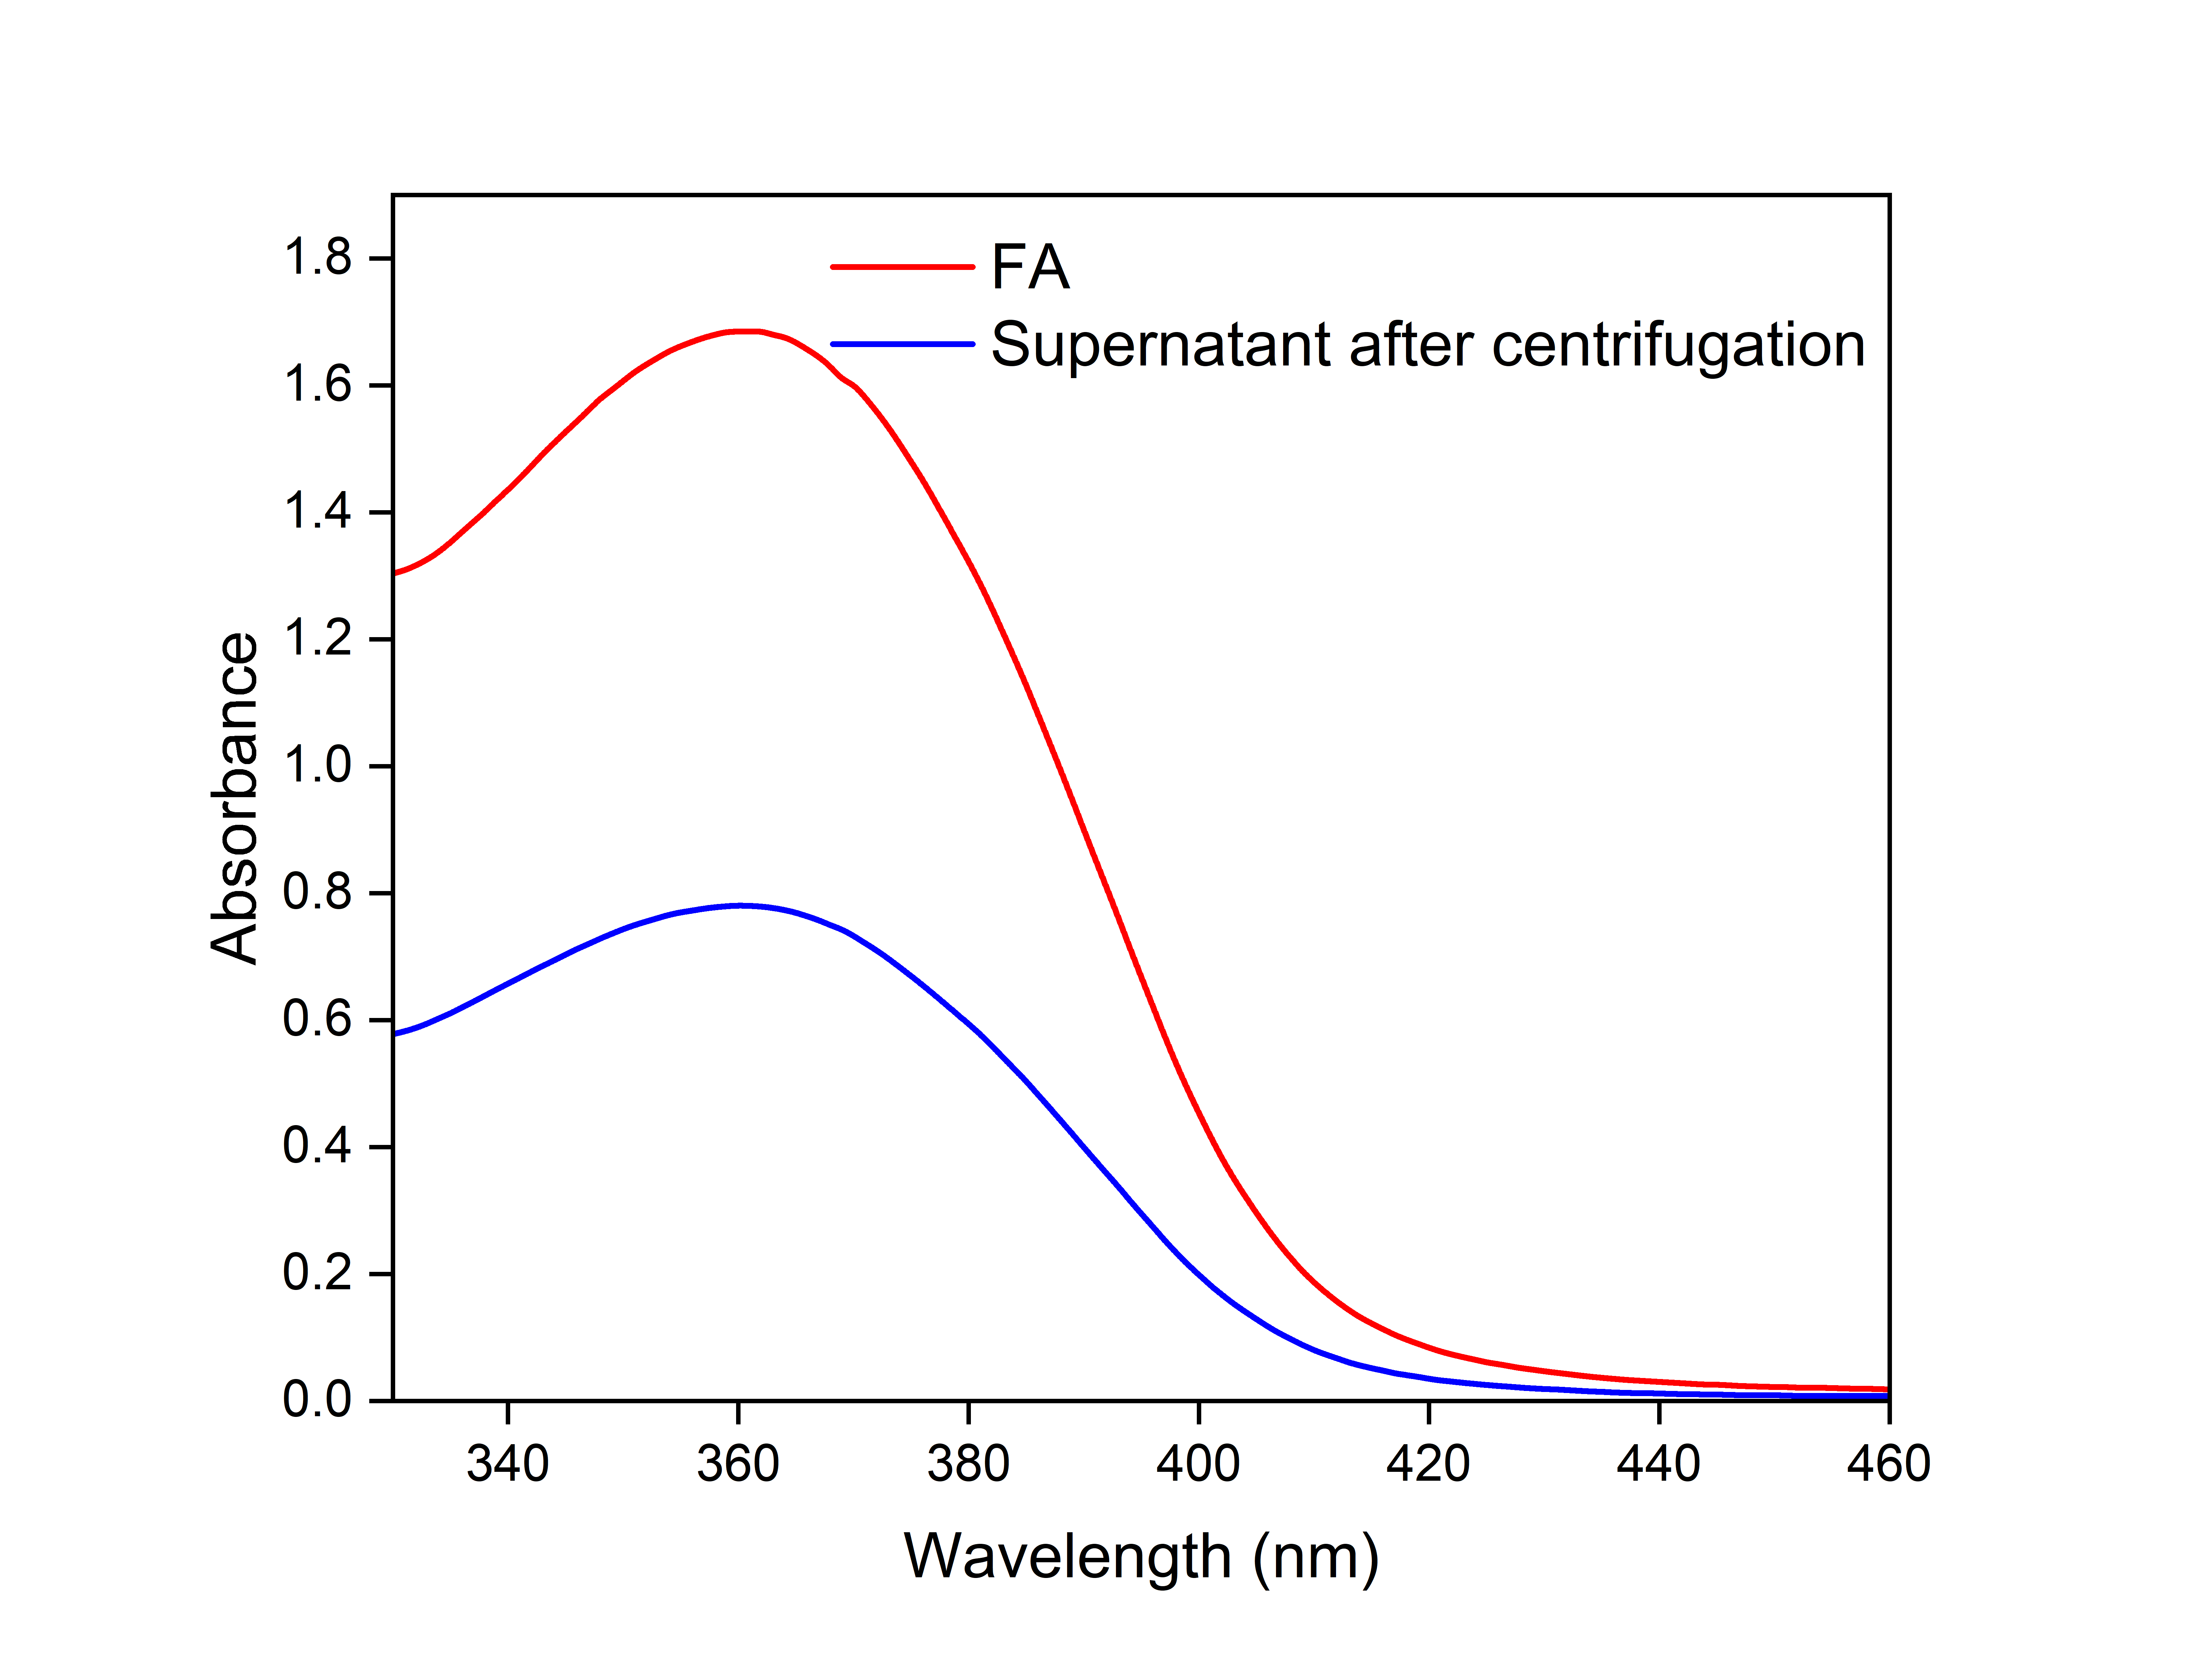


Figure S3. The absorbance of folic acid before and after the reaction.


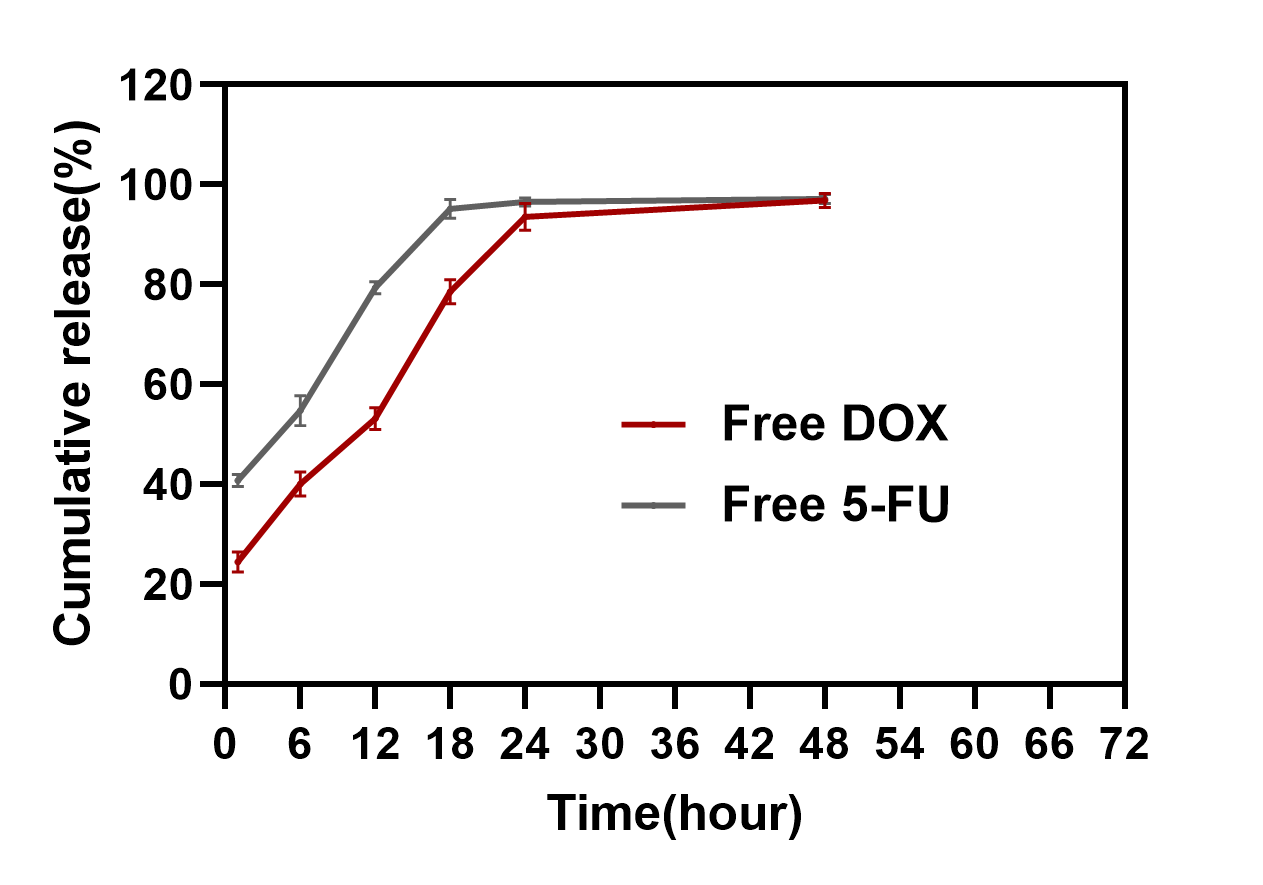


Figure S4. In vitro release profiles of Free DOX and Free 5-Fu in PBS at pH 7.4 (n = 3, mean ± SD).


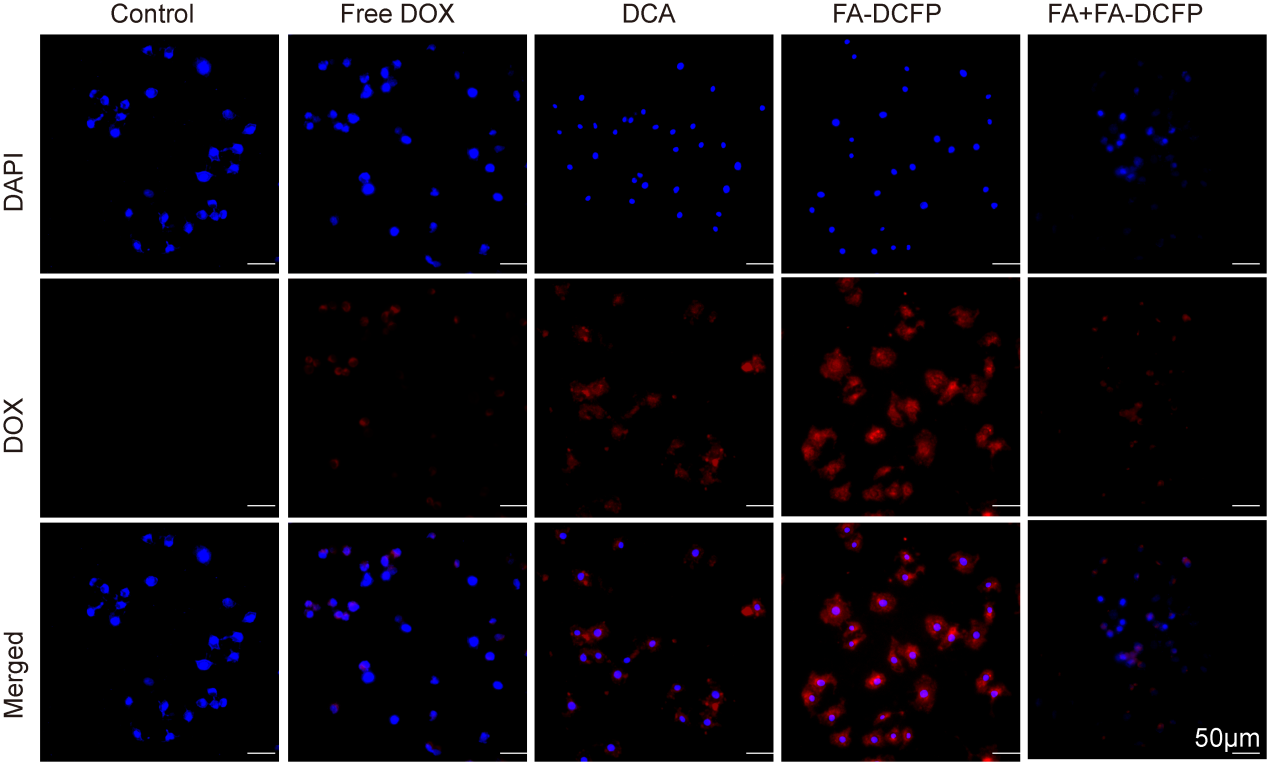


Figure S5. Fluorescence images of different drugs taken up by HepG2 cells. Scale bar = 50 μm. (n = 3)


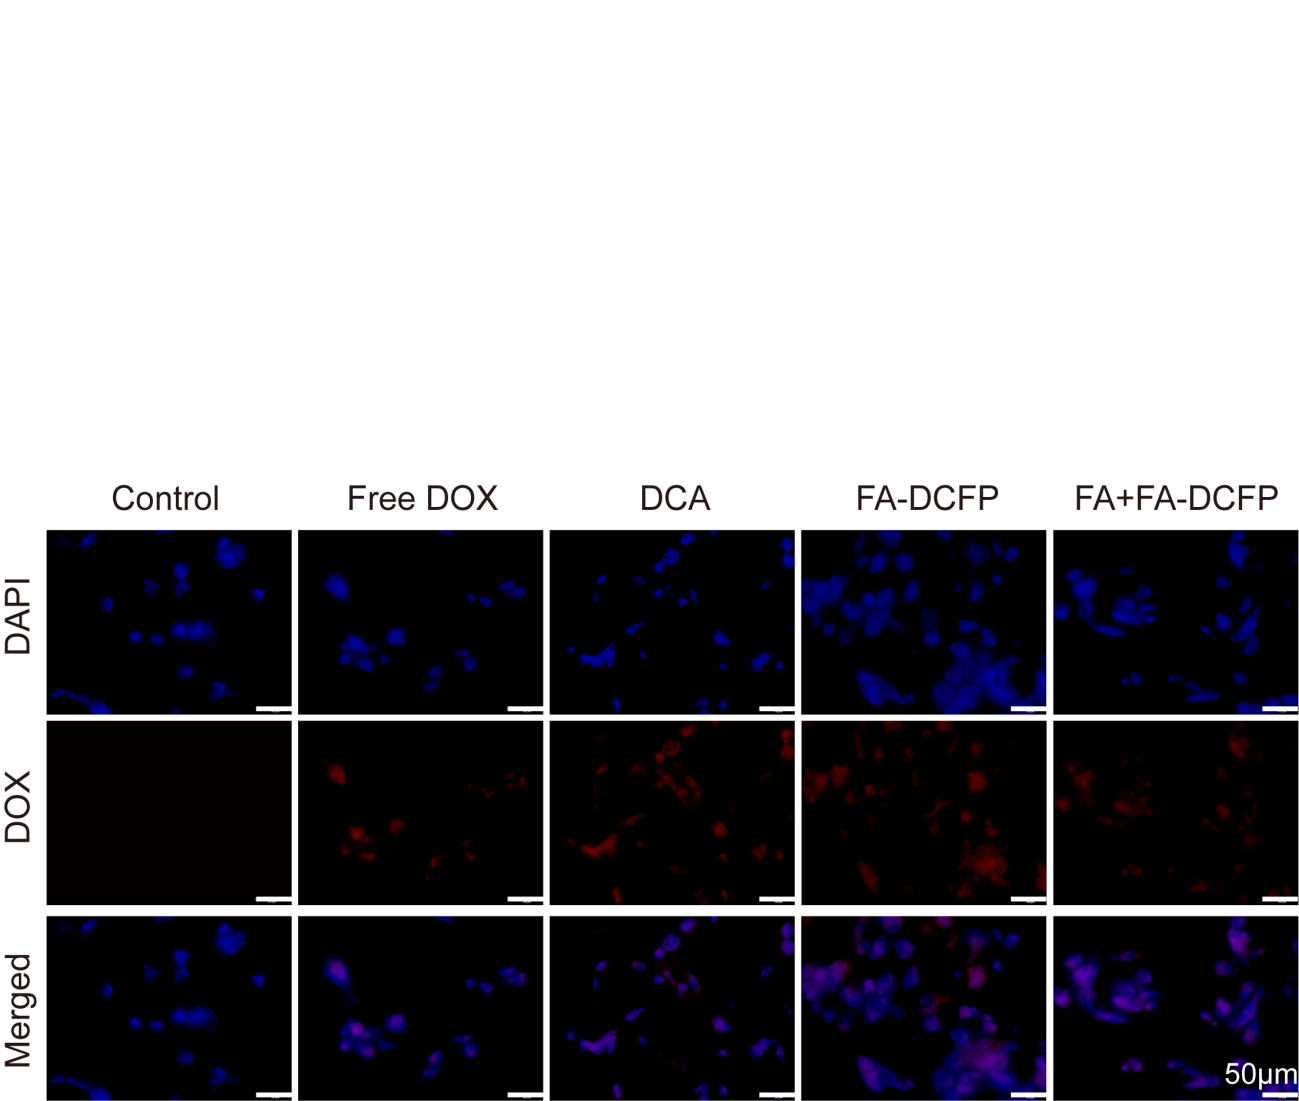


Figure S6. Fluorescence images of different drugs taken up by THLE-2 cells. Scale bar = 50 μm. (n = 3)


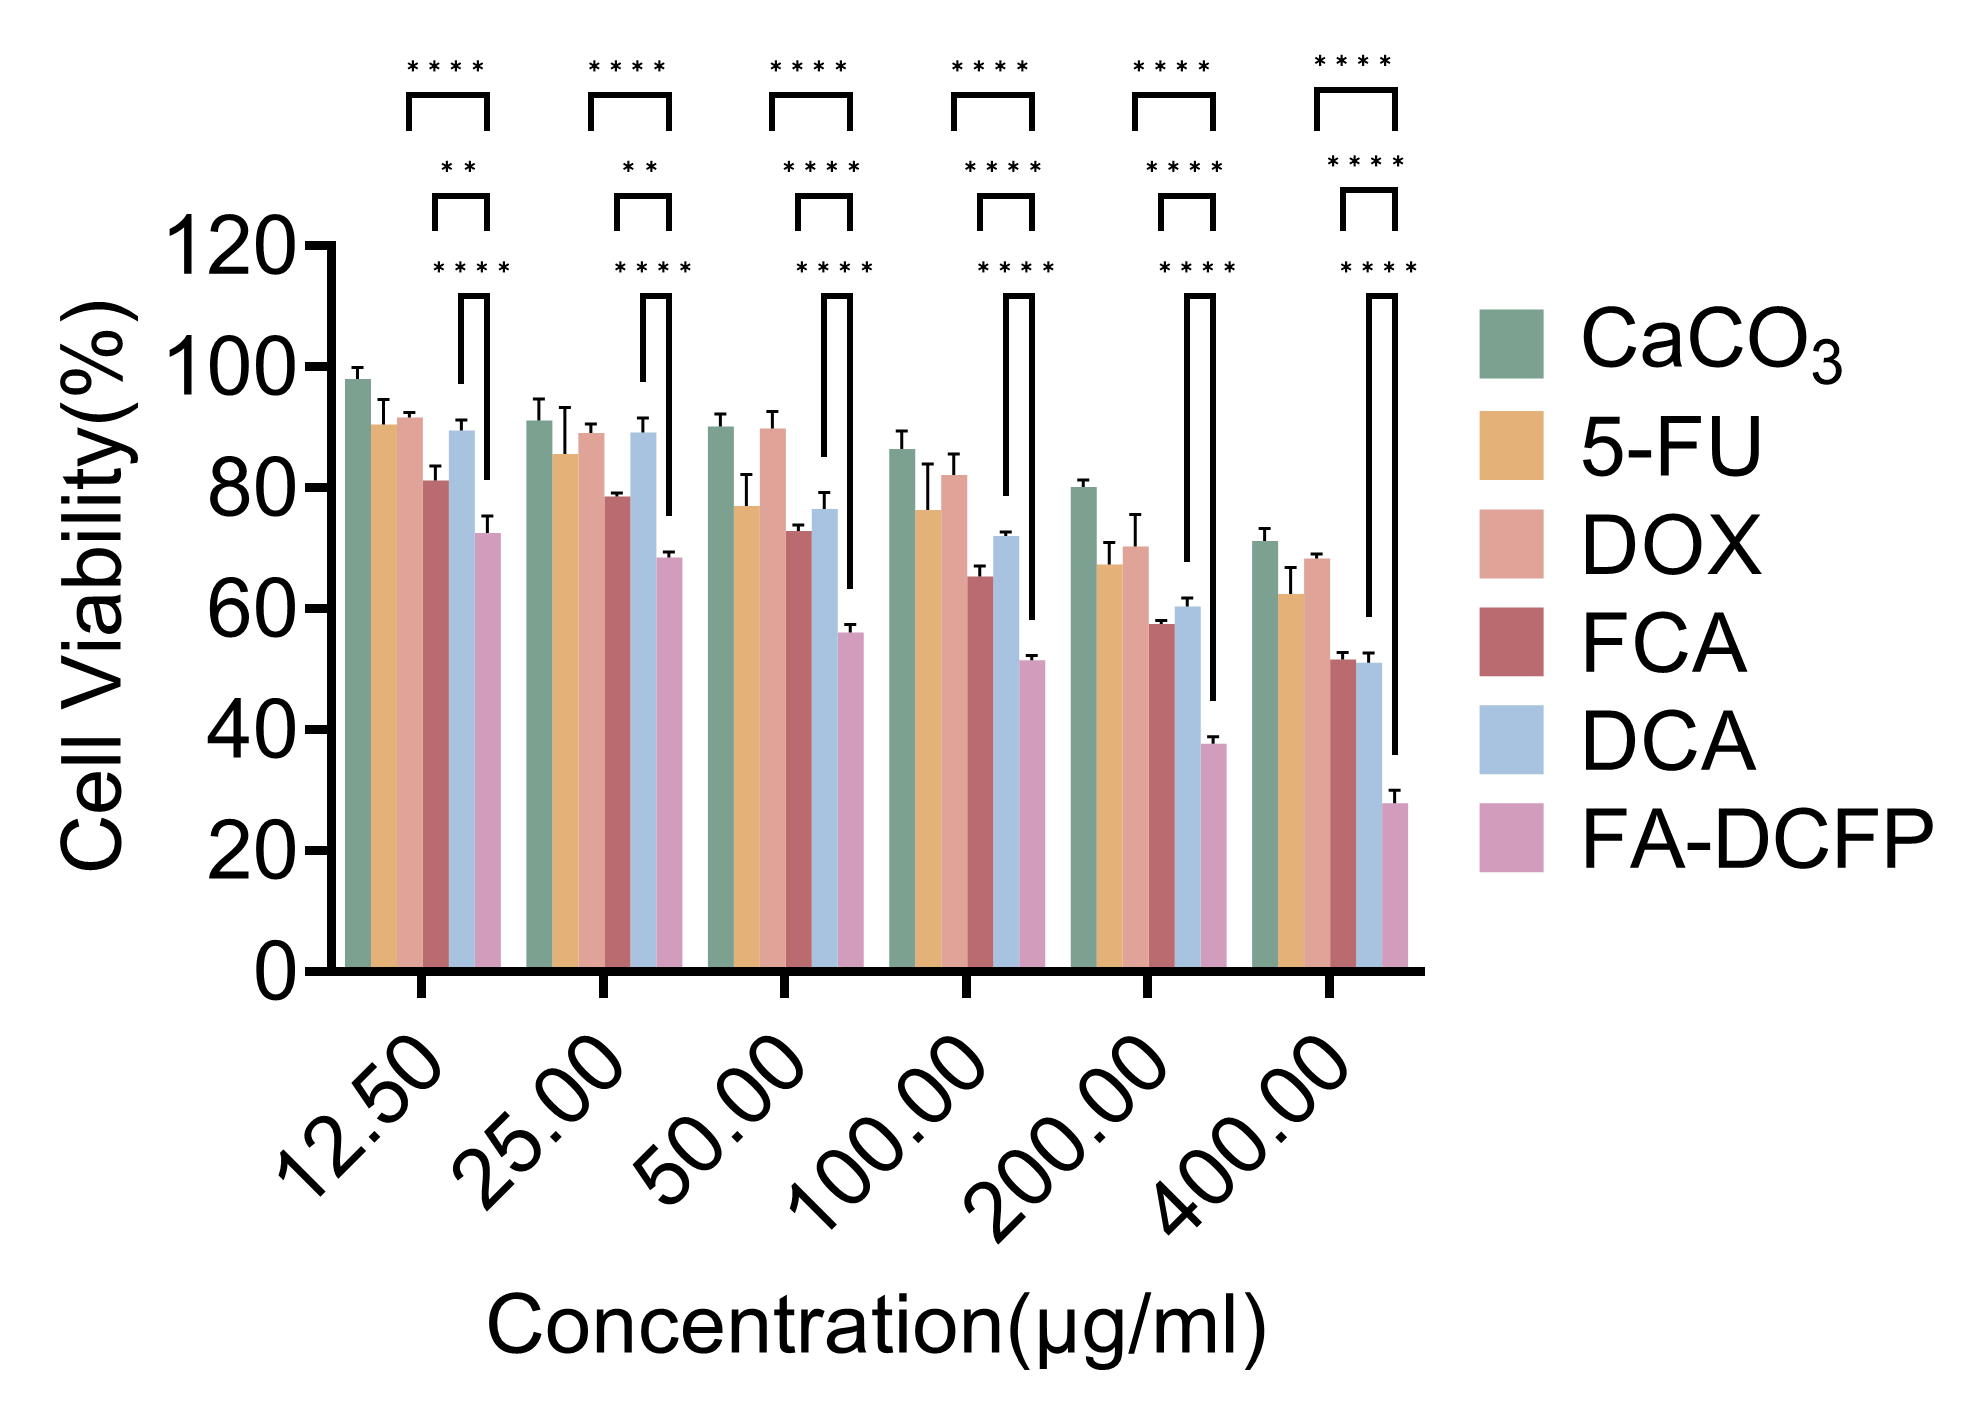


Figure S7. Cell viability of CaCO3、5-Fu、DOX、FCA (CaCO3+5-Fu)、DCA (CaCO3+DOX) and FA-DCFP (FA+CaCO3+DOX+5-Fu+PDA) nanoparticles on HepG2 cells.(n = 3) Results are presented as means±SD. **P<0.01, ****P<0.0001.


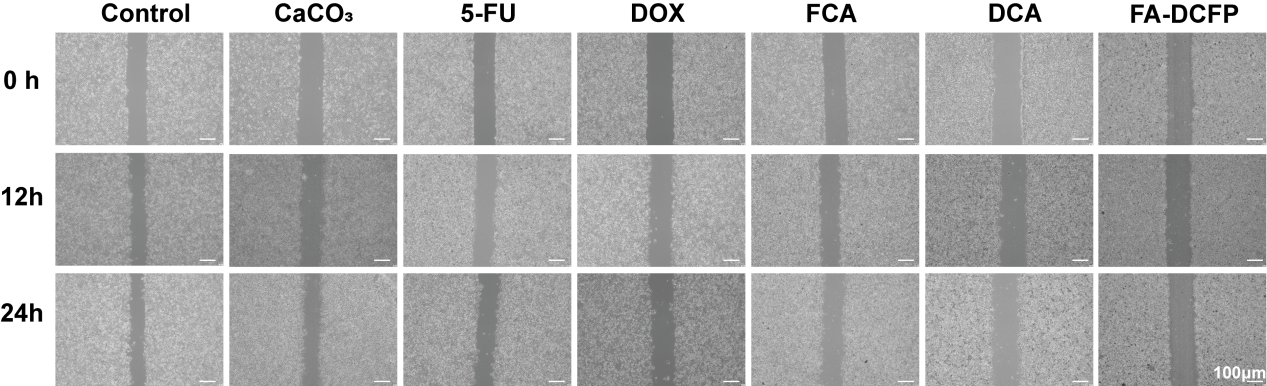


Figure S8. Photographs of wound healing captured at 0，12，and 24 hours.(n = 3)


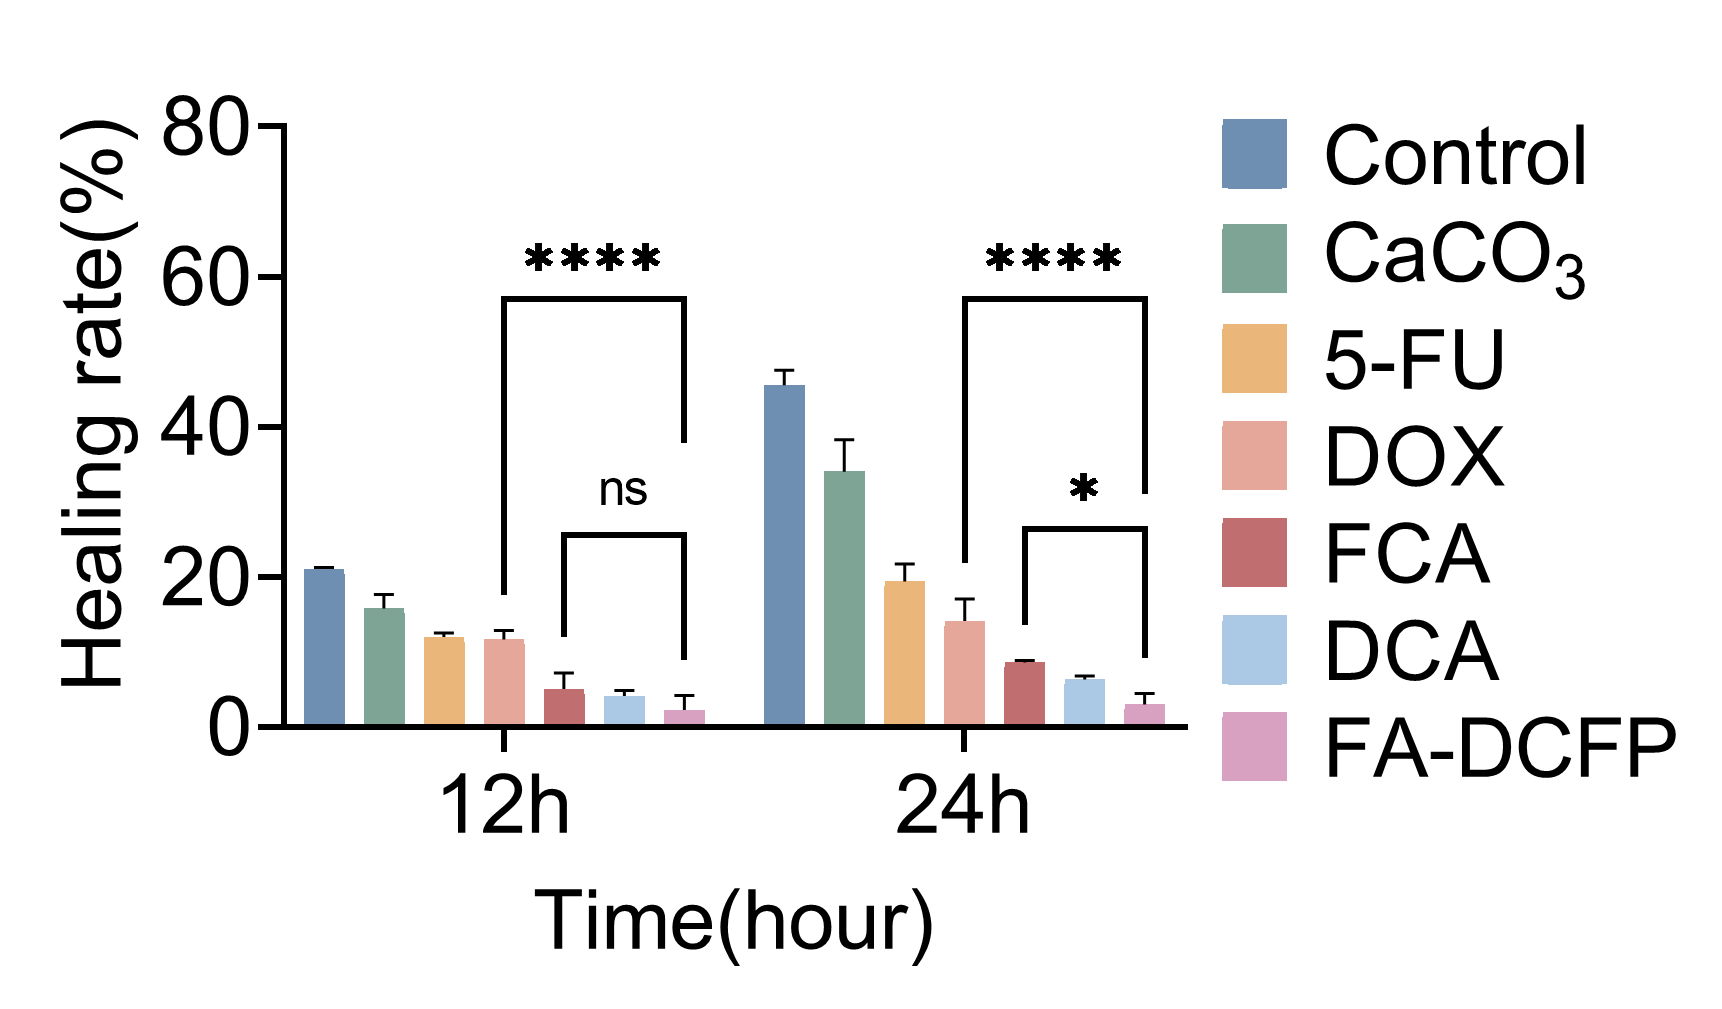


Figure S9. Healing rate of HepG2 cell groups (n = 3). Results are presented as means±SD. ns: no statistical significance, *P<0.05, ****P<0.0001.


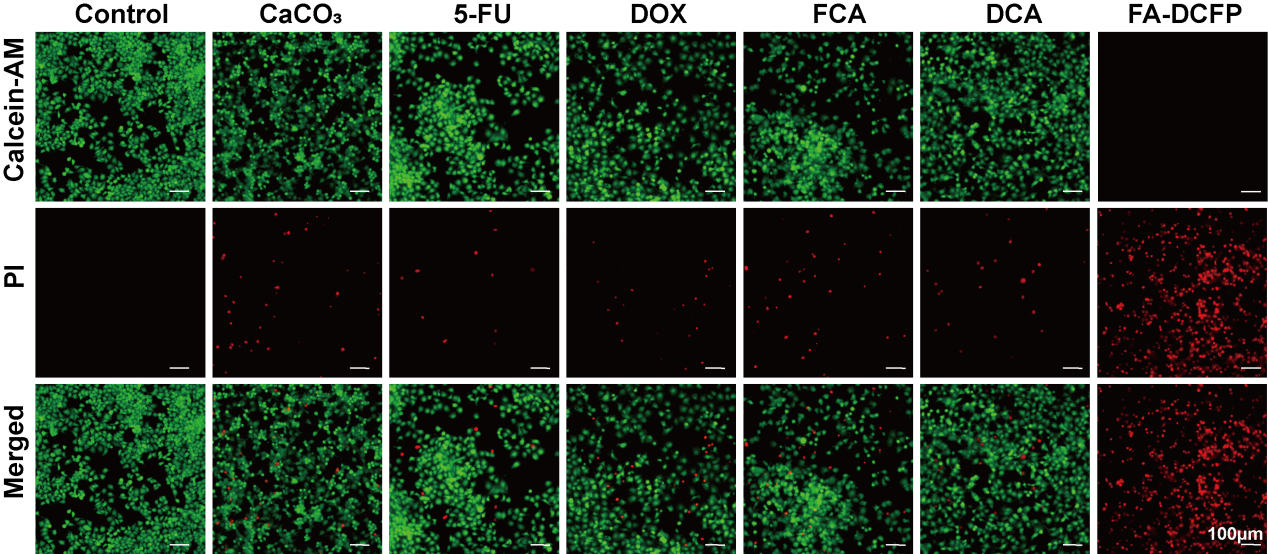


Figure S10. Cell viability of CaCO3、5-Fu、DOX、FCA (CaCO3+5-Fu)、DCA (CaCO3+DOX) and FA-DCFP (FA+CaCO3+DOX+5-Fu+PDA) nanoparticles on HepG2 cells. (n = 3)


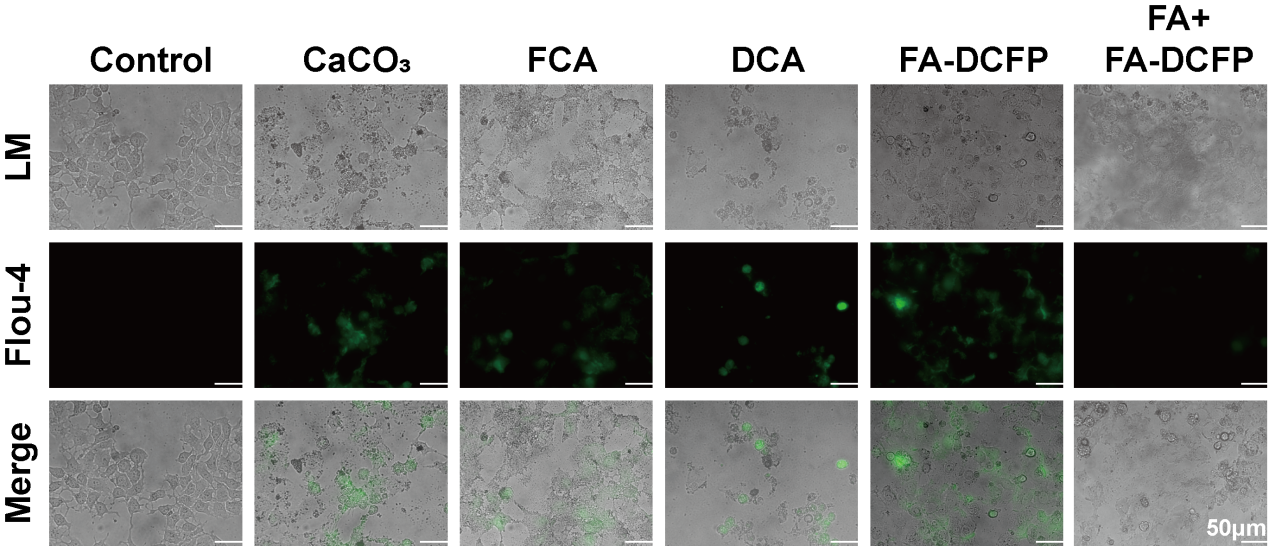


Figure S11. Fluorescence image of CaCO3, FCA (CaCO3+5-Fu), DCA (CaCO3+DOX), FA-DCFP (FA+CaCO3+DOX+5-Fu+PDA) and FA+FA-DCFP treated tumour cells for 24 hours and then stained with Flou-4. (n = 3)


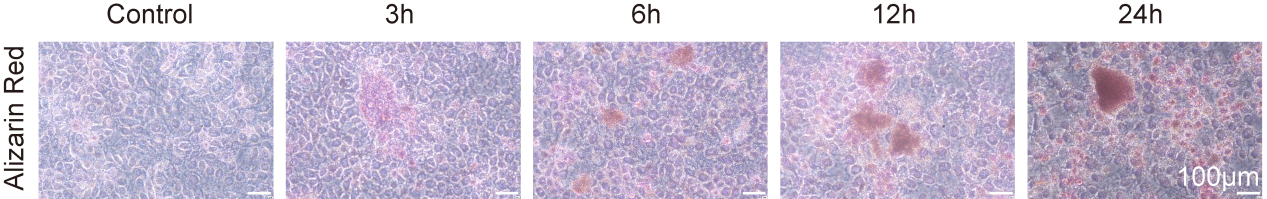


Figure S12. Tumor cells were incubated with FA-DCFP for varying periods and then stained with alizarin red to identify in vitro cellular products that exhibited red areas of calcification. (n = 3)


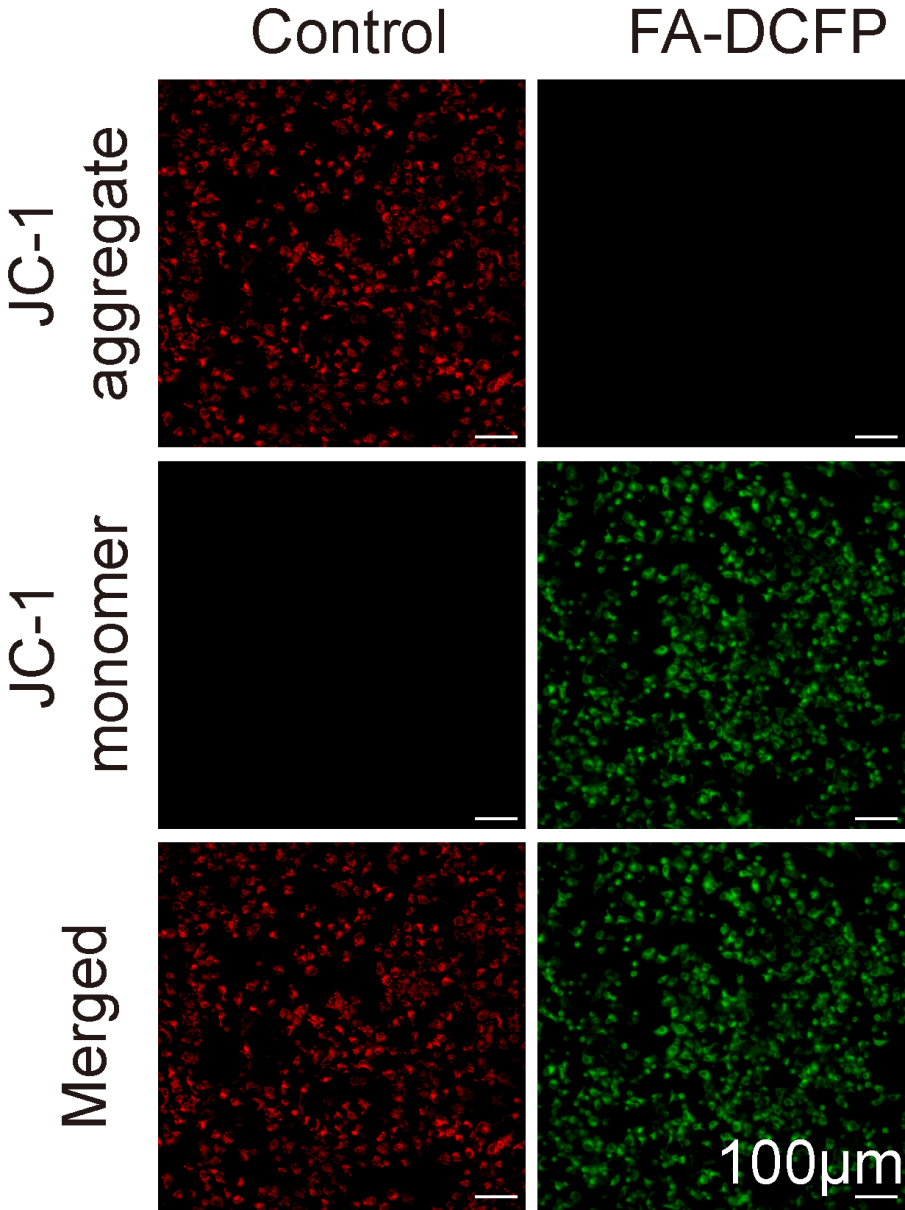


Figure S13. Tumour cells were incubated with FA-DCFP for 24 hours, and then stained with JC-1. (n = 3)


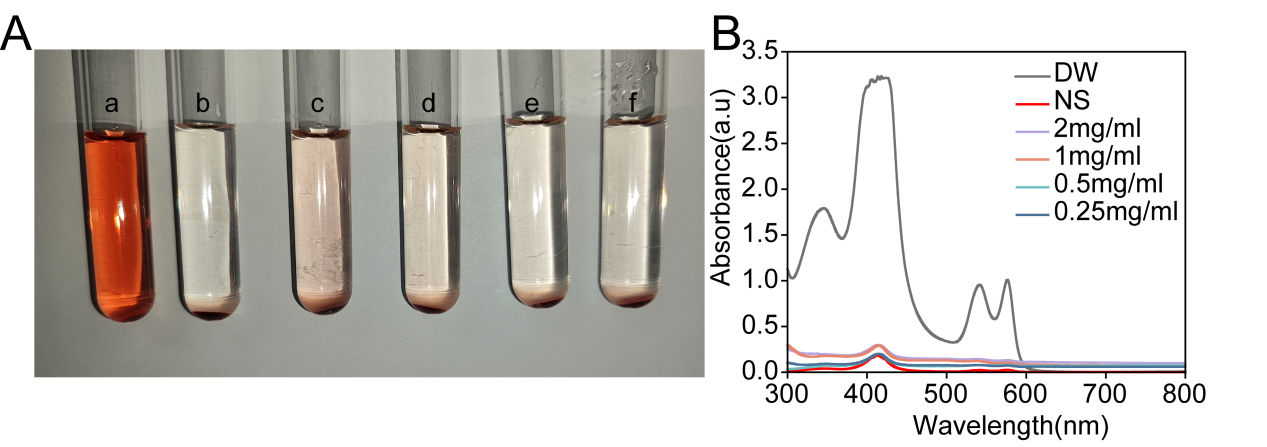


Figure S14. In vitro analysis of haemolysis. A) Photographs showing haemolysis. a: DW; b: NS; c: FA-DCFP 2 mg/ml; d: FA-DCFP 1 mg/ml; e: FA-DCFP 0.5 mg/ml; f: FA-DCFP 0.25 mg/ml. B) Rate of haemolysis in each group.
